# Supplementary material for: Hepatic ARID3A facilitates liver cancer malignancy by cooperating with CEP131 to regulate an embryonic stem cell-like gene signature
Source: PubMed Central journal article supplement (PMC9411159; doi:10.1038/s41419-022-05187-9), 2022-08-25

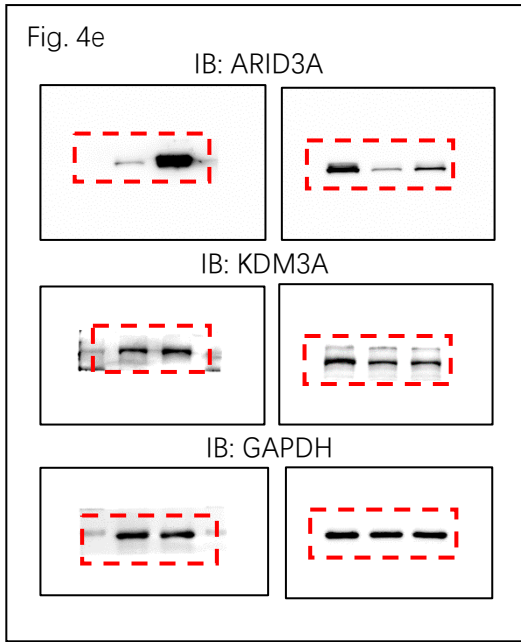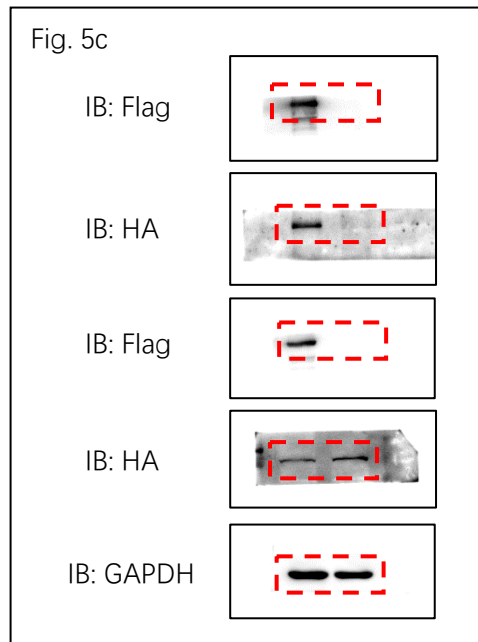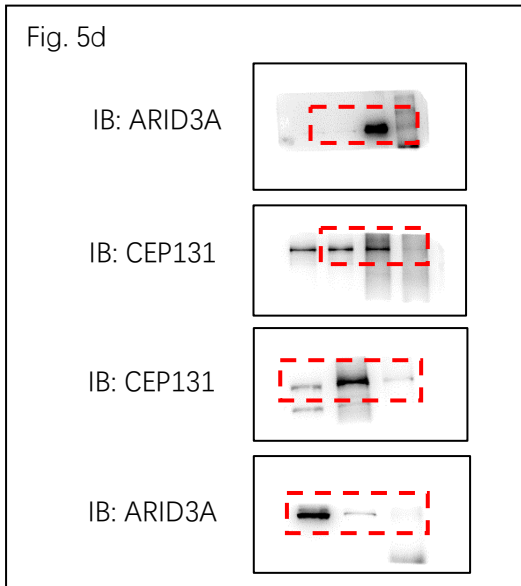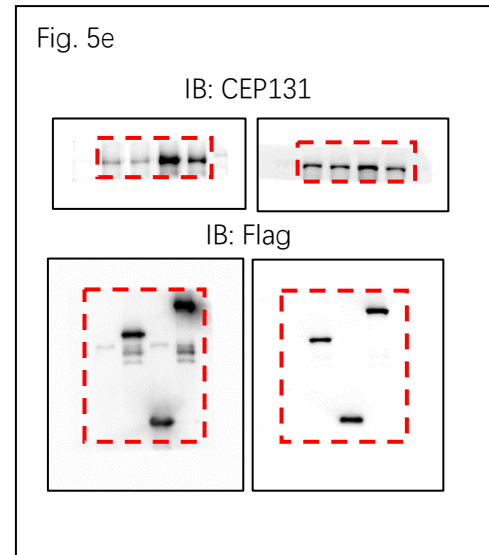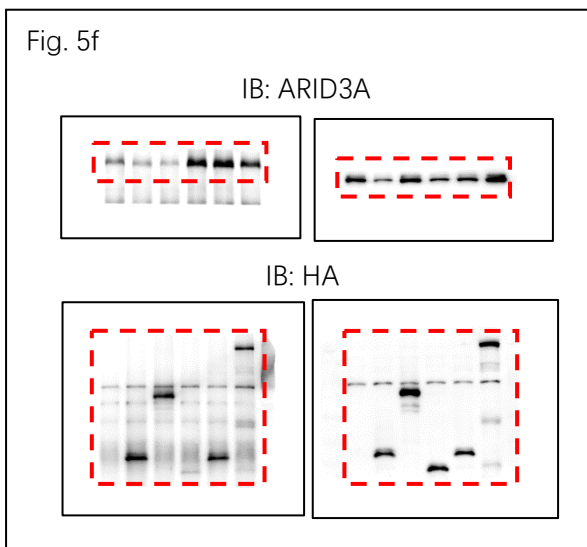

Fig. 6b

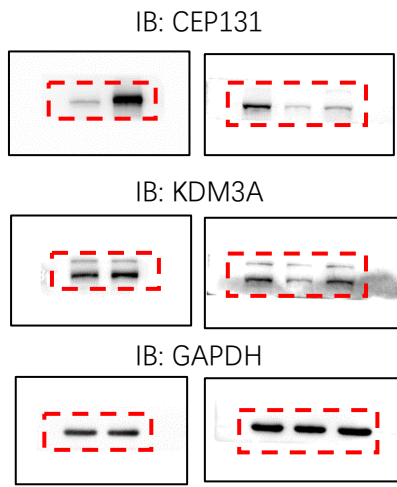

Fig. S2b

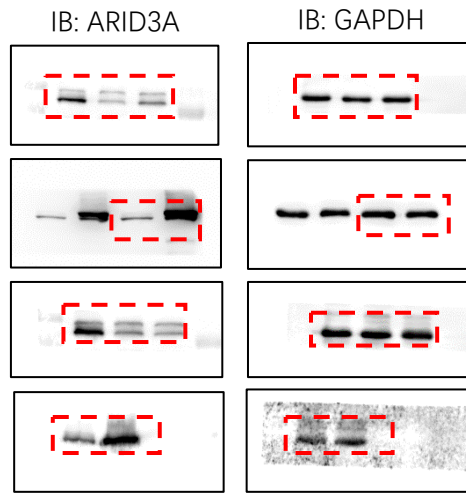

Fig. S4h

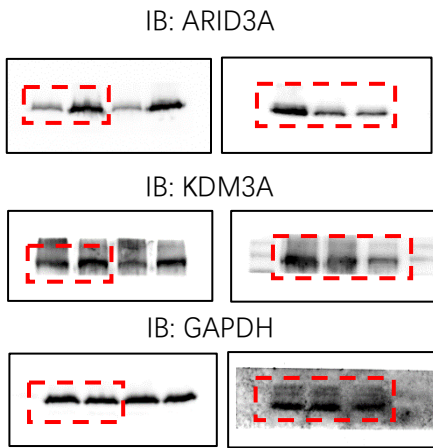

Fig. S6a

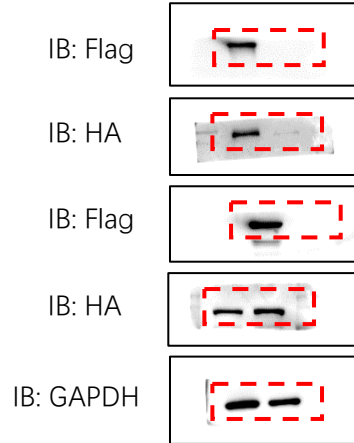

Fig. S6b

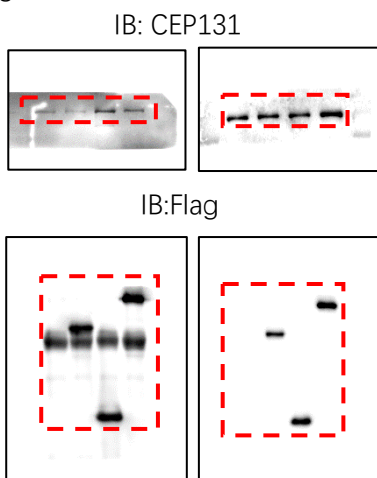

Fig. S6c

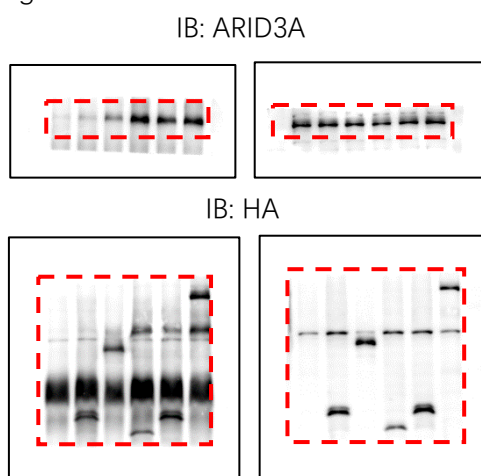

Supplement: 41419_2022_5187_MOESM3_ESM.pdf [file 41419_2022_5187_MOESM3_ESM.pdf]
